# Supplementary material for: Loss of function of Colgalt1 disrupts collagen post-translational modification and causes musculoskeletal defects
Source: PubMed Central journal article supplement (PMC6602307; doi:10.1242/dmm.037176), 2019-06-17
Supplement: dmm-12-037176-s1.pdf [file dmm-12-037176-s1.pdf]

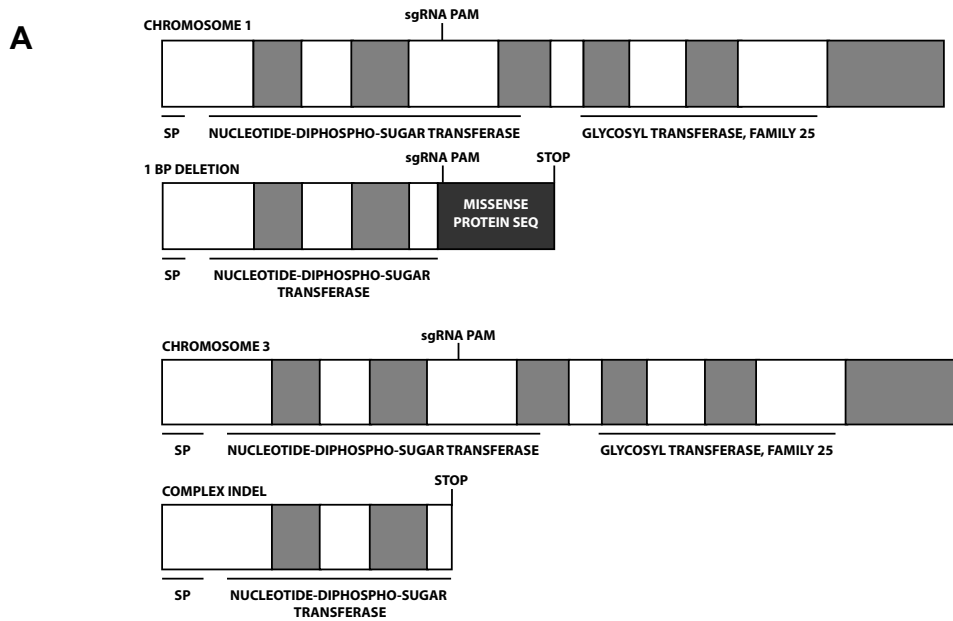

**Figure S1.**

A) In zebrafish *colgalt1* is duplicated, with loci on chromosomes 1 and 3. Targeting these at the sgRNA PAM sites shown led to the generation of a 1 bp deletion in *colgalt1b* on chromosome 1 (*colgalt1b*<sup>1bpdelex5</sup>), and an 11 bp deletion/19 bp insertion in *colgalt1a* on chromosome 3 (*colgalt1a*<sup>11bpdel19bpinex5</sup>). Predicted open reading frames for the encoded proteins indicate that both mutations cause frameshifts followed by premature stop codons, which should lead to loss of *colgalt1a* and *colgalt1b* activity in double homozygous fish.

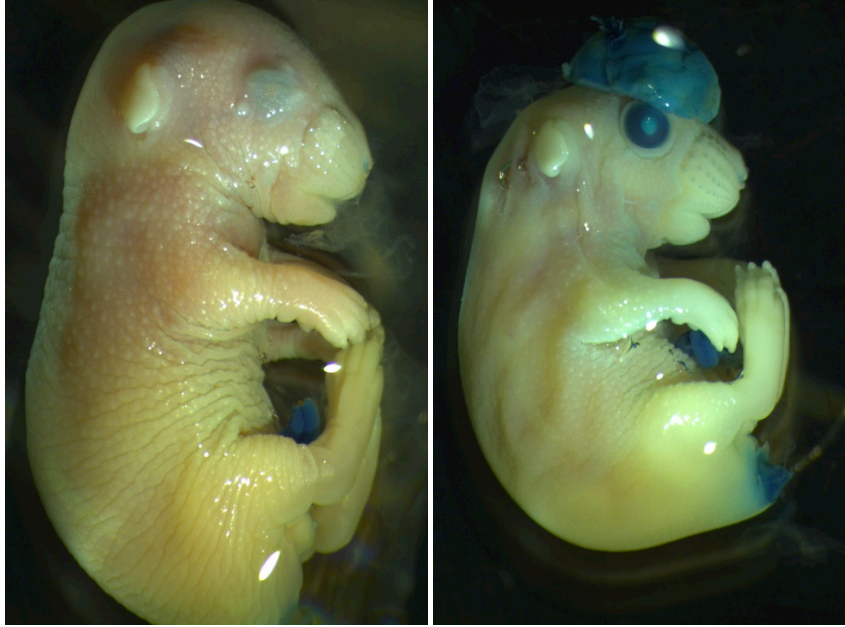

**Figure S2.**

To test the barrier function of *Colgalt1*<sup>fosse/fosse</sup> skin, we conducted a skin barrier assay (23). This test makes use of the intrinsic beta-galactosidase activity of the skin at its basal layers; normal skin will keep the X-gal out of the basal layers of the skin, while a disrupted skin barrier will allow the X-gal to reach these basal layers, where beta-galactosidase will catalyze the substrate to a blue by-product, turning the skin blue. The skin of wild type (left panel) and *Colgalt1*<sup>fosse/fosse</sup> (right panel) E18.5 embryos are not stained when treated with X-gal, demonstrating the skin barrier in the mutant is intact. As shown, mutant embryos demonstrate variable exencephaly and open eyes.
